# Supplementary material for: Bile acid TUDCA improves insulin clearance by increasing the expression of insulin-degrading enzyme in the liver of obese mice
Source: PubMed Central journal article supplement (PMC5665899; doi:10.1038/s41598-017-13974-0), 2017-11-01

**Bile acid TUDCA improves insulin clearance by increasing the expression of insulin-degrading enzyme in the liver of obese mice**

Jean Franciesco Vettorazzi<sup>a</sup>, Mirian Ayumi Kurauti<sup>a</sup>, Gabriela Moreira Soares, Patricia Cristine Borck, Sandra Mara Ferreira, Renato Chaves Souto Branco, Luciana de Souza Lima Michelone, Antonio Carlos Boschero, Jose Maria Costa Junior\* & Everardo Magalhães Carneiro\*#

Department of Structural and Functional Biology, Institute of Biology, University of Campinas (UNICAMP), 13083-970  
Campinas, SP, Brazil

<sup>a</sup> These authors contributed equally to this study

\* These authors contributed equally to the conception and supervision of this study

**Full unedited gel from Figure 03**

**Groups: CON, CON + TUDCA, HFD, HFD + TUDCA (Membrane 01 and 02)**

**CON, HFD, HF + TUDCA (Membrane 03)**

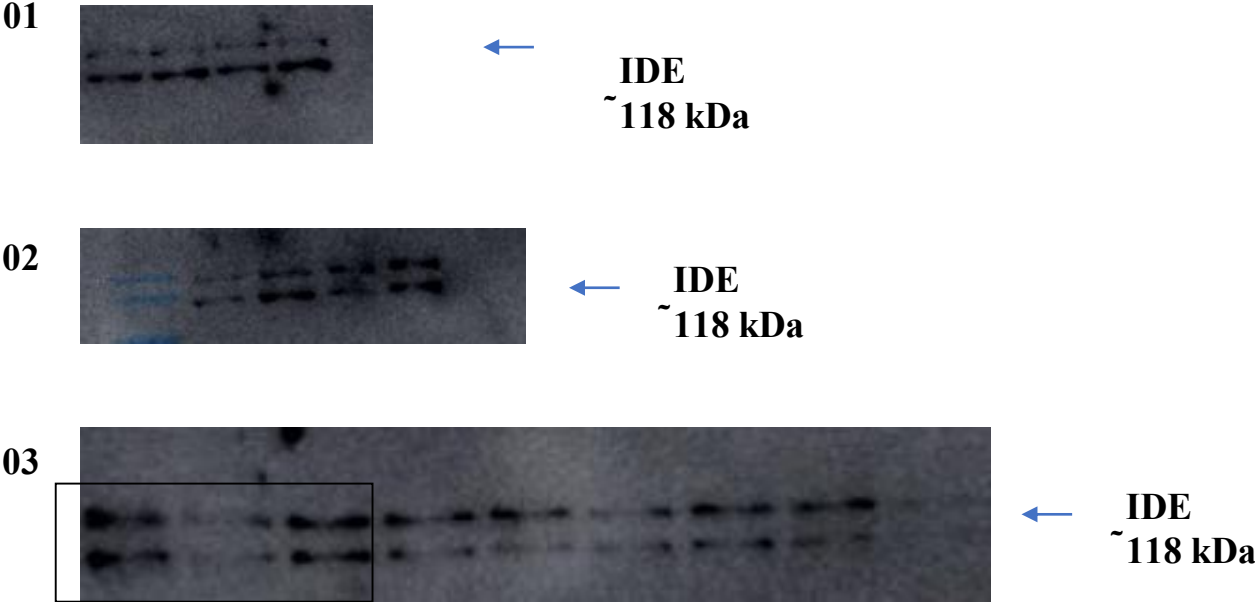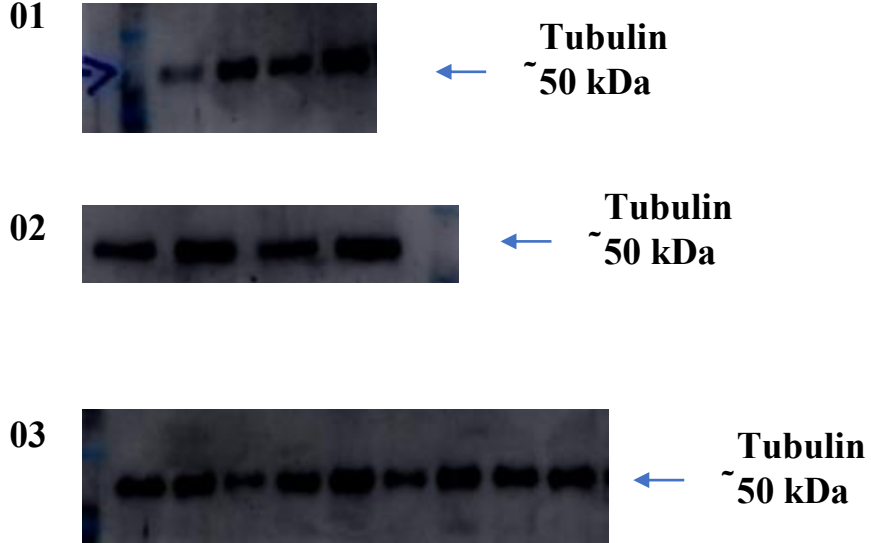

**Full unedited gel from Figure 04A**

**Groups: CON, T50, T100, T200**

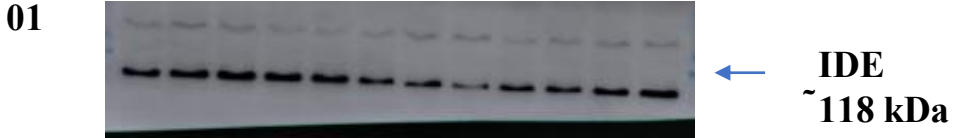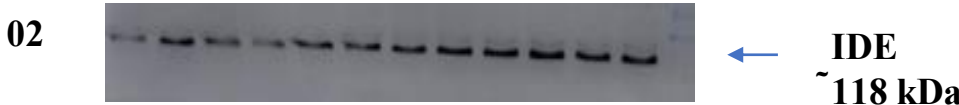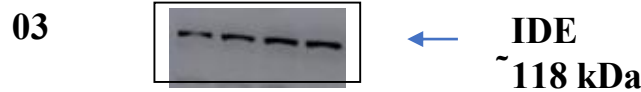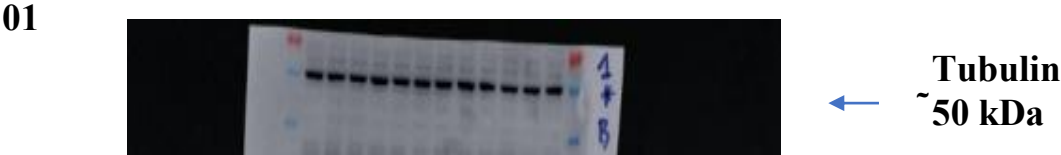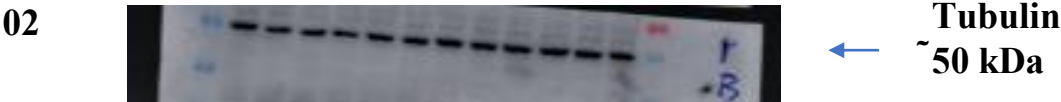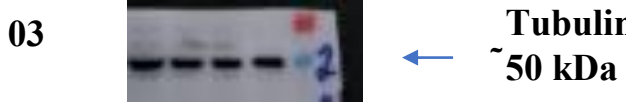

**Full unedited gel from Figure 04B**

**Groups: CON, CON + JTE-013, TUDCA, TUDCA + JTE-013**

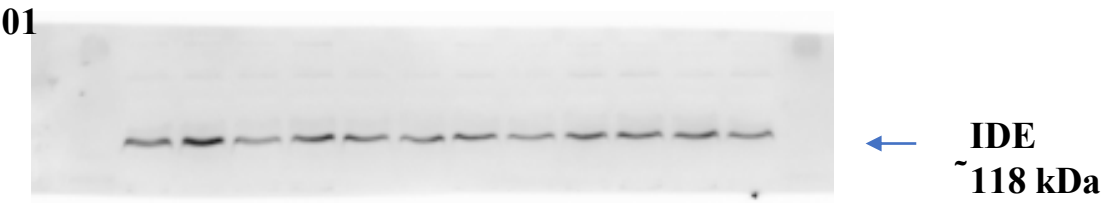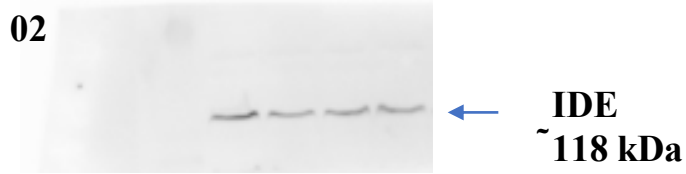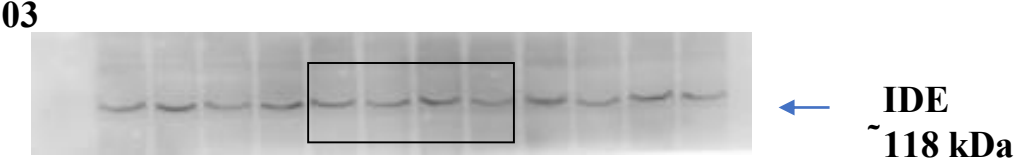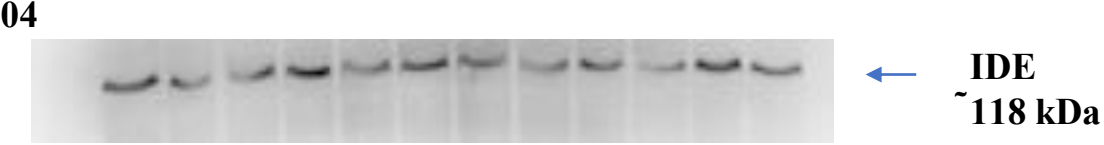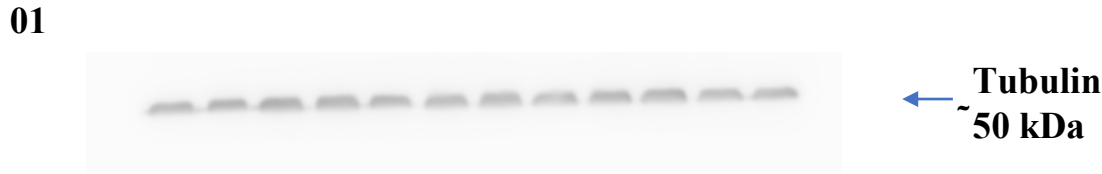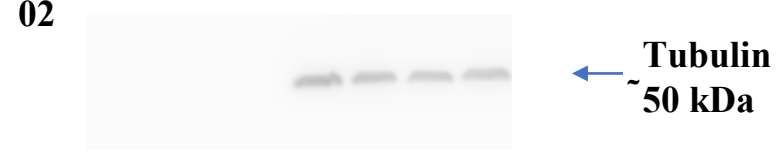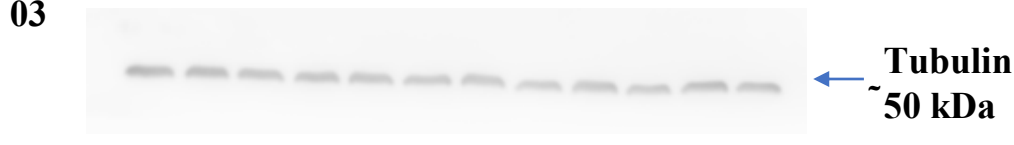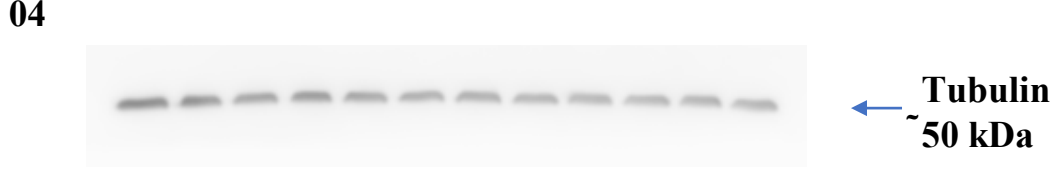

Full unedited gel from Figure 04C

Groups: CON, CON + S961, TUDCA, TUDCA + S961

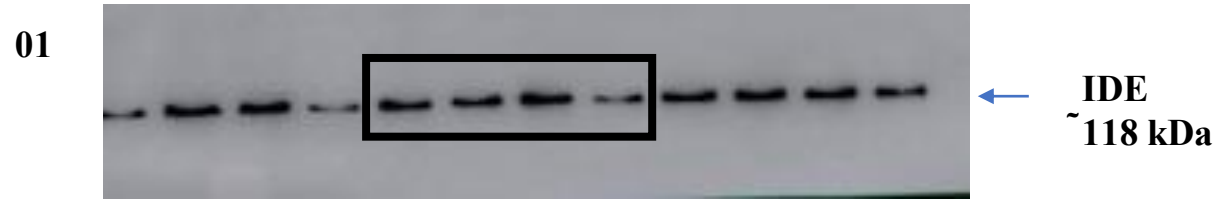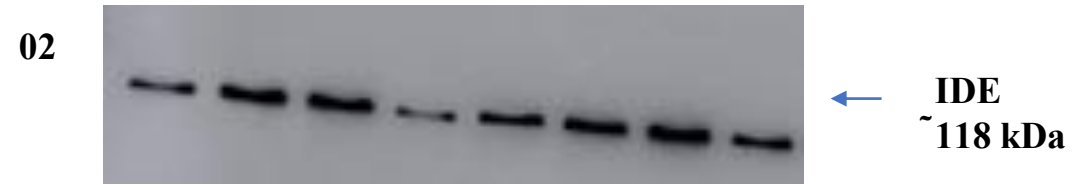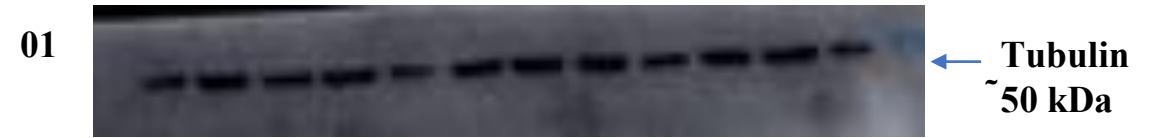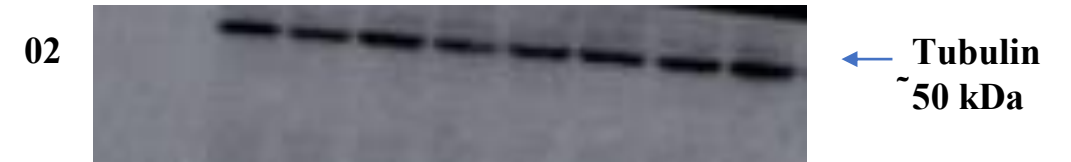

# Full unedited gel from Figure 04D

Groups: CON, CON + MK2206, CON + Wortmannin, TUDCA, TUDCA + MK2206, TUDCA + Wortmannin

Full unedited gel from Figure 04D

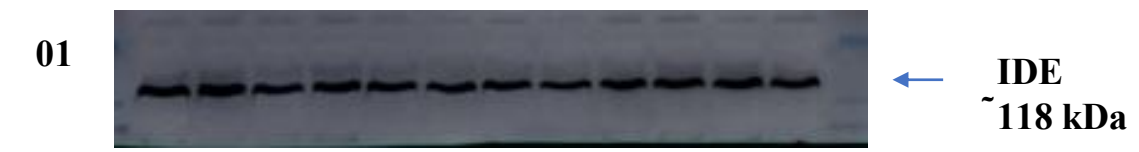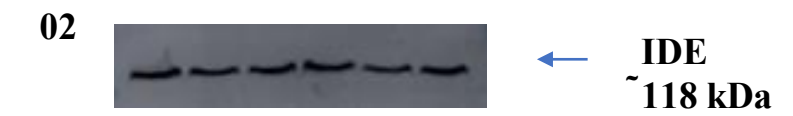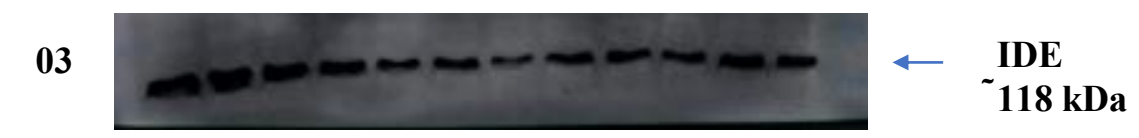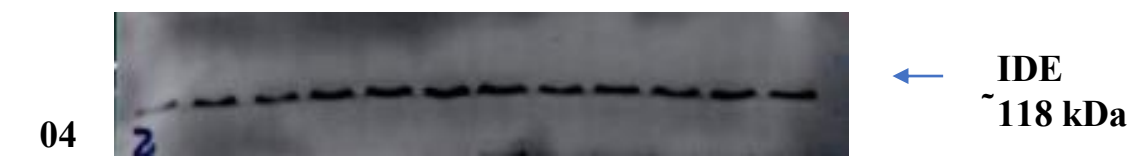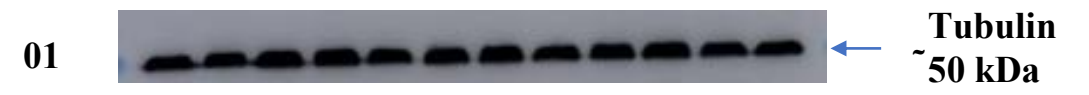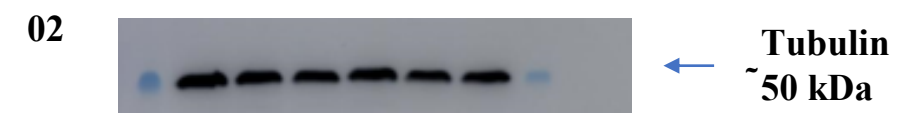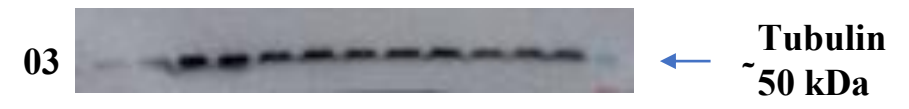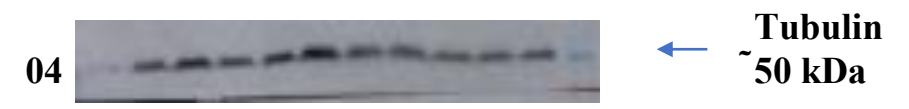

Supplement: 41598_2017_13974_MOESM1_ESM.pdf [file 41598_2017_13974_MOESM1_ESM.pdf]
